# Supplementary material for: Supramolecular presentation of bioinstructive peptides on soft multilayered nanobiomaterials stimulates neurite outgrowth
Source: Royal Society of Chemistry journal article supplement (doi:10.1039/d3bm00438d), 2023-01-01
Supplement: d3bm00438d1.pdf [file d3bm00438d1.pdf]

## ***Supporting Information***

### **Supramolecular Presentation of Bioinstructive Peptides on Soft Multilayered Nanobiomaterials Stimulates Neurite Outgrowth**

Maria Lopes,<sup>a</sup> Marília Torrado,<sup>b,c</sup> Daryl Barth,<sup>a,d</sup> Sofia D. Santos,<sup>b</sup> Melike Sever-  
Bahcekapili,<sup>e,f</sup> Ayse B. Tekinay,<sup>e</sup> Mustafa O. Guler,<sup>g</sup> Franck Cleymand,<sup>d</sup> Ana P. Pêgo,<sup>b,c</sup>  
João Borges,<sup>\*a</sup> João F. Mano<sup>\*a</sup>

<sup>a</sup>CICECO - Aveiro Institute of Materials, Department of Chemistry, University of Aveiro,  
Campus Universitário de Santiago, 3810-193 Aveiro, Portugal

<sup>b</sup>INEB – Instituto de Engenharia Biomédica & i3S - Instituto de Investigação e Inovação  
em Saúde, Universidade do Porto, Rua Alfredo Allen, 208, 4200-135 Porto, Portugal

<sup>c</sup>ICBAS – Instituto de Ciências Biomédicas Abel Salazar, Universidade do Porto, Rua de  
Jorge Viterbo Ferreira, 228, 4050-313 Porto, Portugal

<sup>d</sup>Institut Jean Lamour, UMR 7198 CNRS – Université de Lorraine, Parc de Saurupt CS  
50840, 54011 Nancy Cedex, France

<sup>e</sup>Institute of Materials Science and Nanotechnology, National Nanotechnology Research  
Center (UNAM), Bilkent University, 06800 Ankara, Turkey

<sup>f</sup>Institute of Neurological Sciences and Psychiatry, Hacettepe University, 06230 Ankara,  
Turkey

<sup>g</sup>The Pritzker School of Molecular Engineering, The University of Chicago, Chicago, IL  
60637, USA

\*Corresponding authors: joaoborges@ua.pt (J.B.); jmano@ua.pt (J.F.M.)

(A)

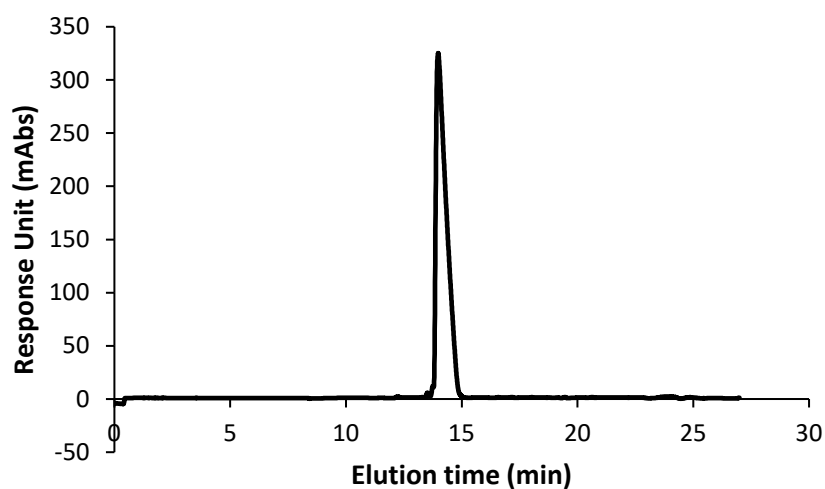

(B)

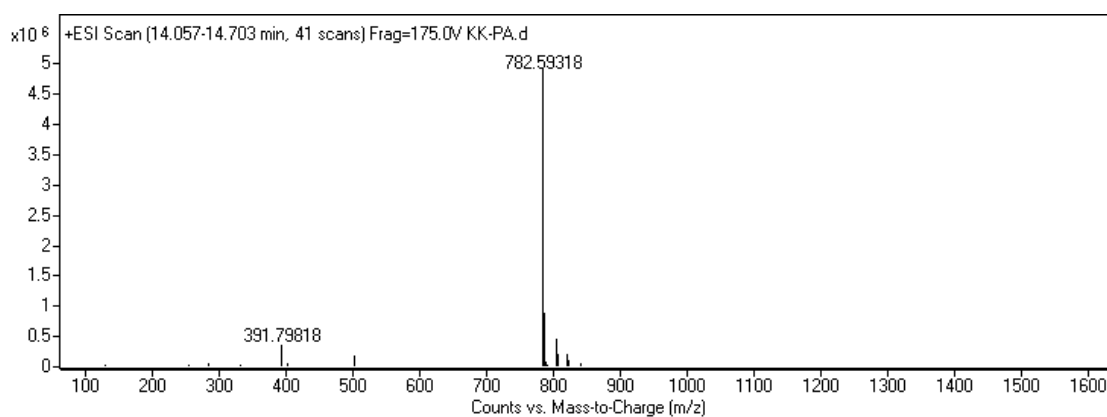

(C)

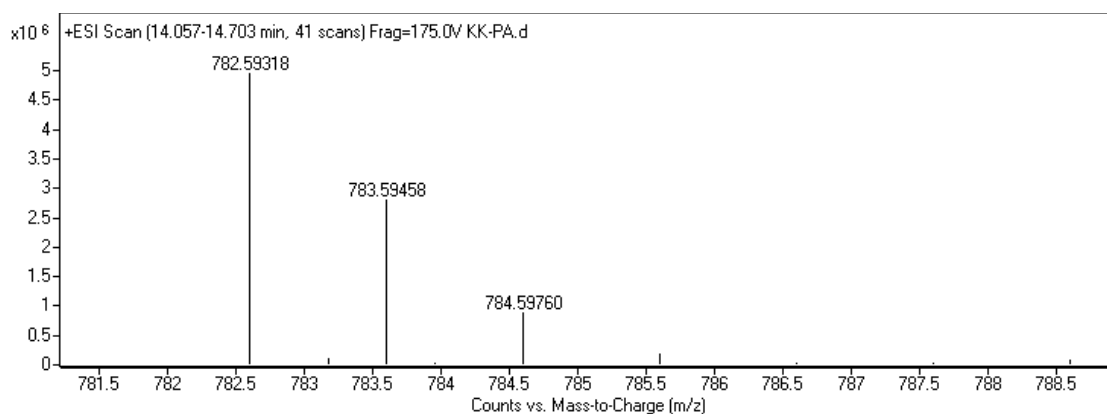

**Fig. S1** (A) Liquid chromatogram and (B, C) mass spectra of K<sub>2</sub>PA. (B) [M+H]<sup>+</sup> (calculated): 782.58 , [M+H]<sup>+</sup> (observed): 782.59, [M+2H]<sup>2+</sup>/2 (calculated): 391.79, [M+2H]<sup>2+</sup>/2(observed): 391.80. (C) [M+H]<sup>+</sup> (calculated): 782.58 , [M+H]<sup>+</sup> (observed): 782.59.

(A)

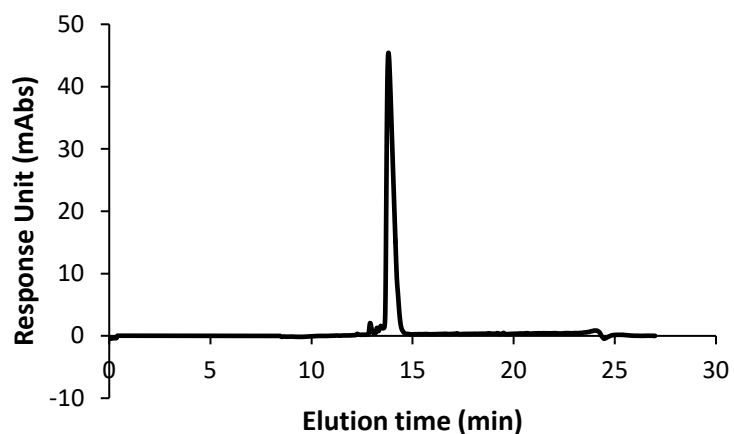

(B)

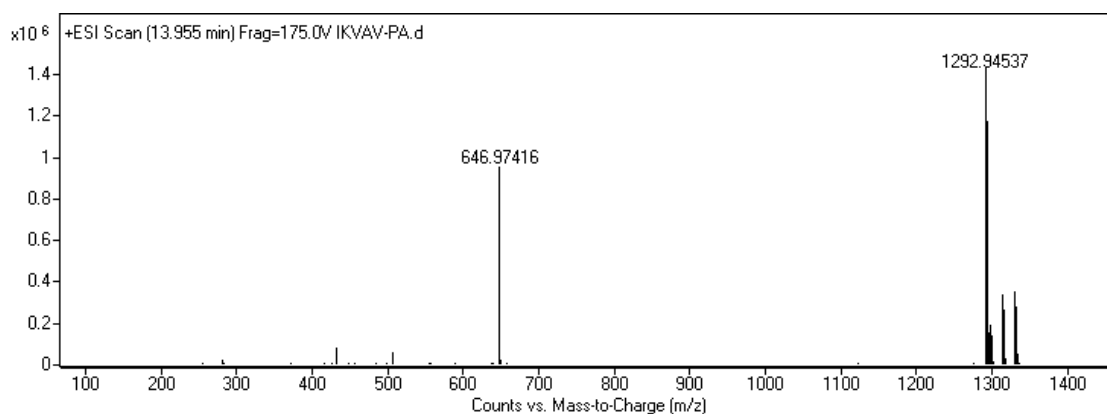

(C)

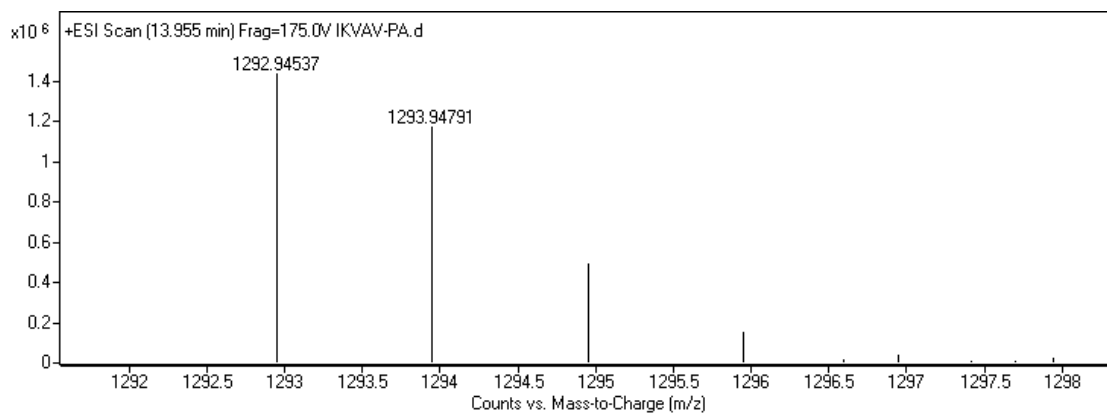

**Fig. S2** (A) Liquid chromatogram and (B, C) mass spectra of  $K_2PA$ -IKVAV. (B)  $[M+H]^+$  (calculated): 1292.93,  $[M+H]^+$  (observed): 1292.94,  $[M+2H]^{+2}/2$  (calculated): 646.96,  $[M+2H]^{+2}/2$  (observed): 646.97. (C)  $[M+H]^+$  (calculated): 1292.93,  $[M+H]^+$  (observed): 1292.94.

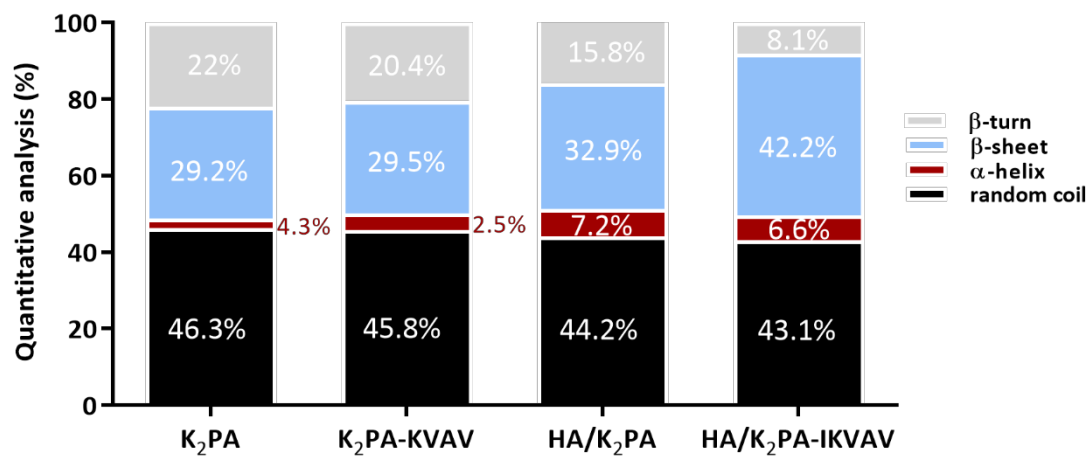

**Fig. S3** Quantitative analysis of the CD spectra of individual K<sub>2</sub>PA and K<sub>2</sub>PA-IKVAV molecules and HA/K<sub>2</sub>PA and HA/K<sub>2</sub>PA-IKVAV co-assembled supramolecular systems (1:1 v/v).

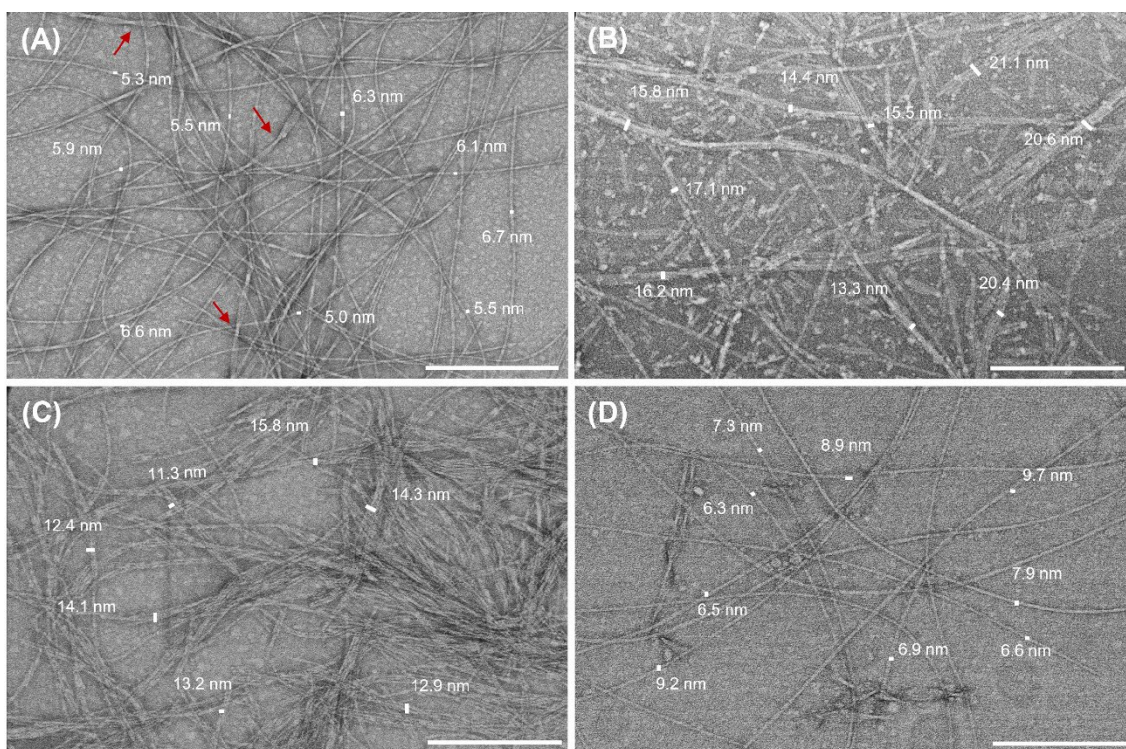

**Fig. S4** Representative TEM micrographs of the nanofibrous structure formed by (A)  $K_2PA$ -IKVAV, (B)  $K_2PA$ , (C) HA/ $K_2PA$ -IKVAV, and (D) HA/ $K_2PA$  systems (1:1 v/v ratio) at 0.2 mg/mL, with nanofiber widths highlighted in white and twisted nanofibers highlighted with red arrows. The magnification factor is x100k. Scale bars: 300 nm.

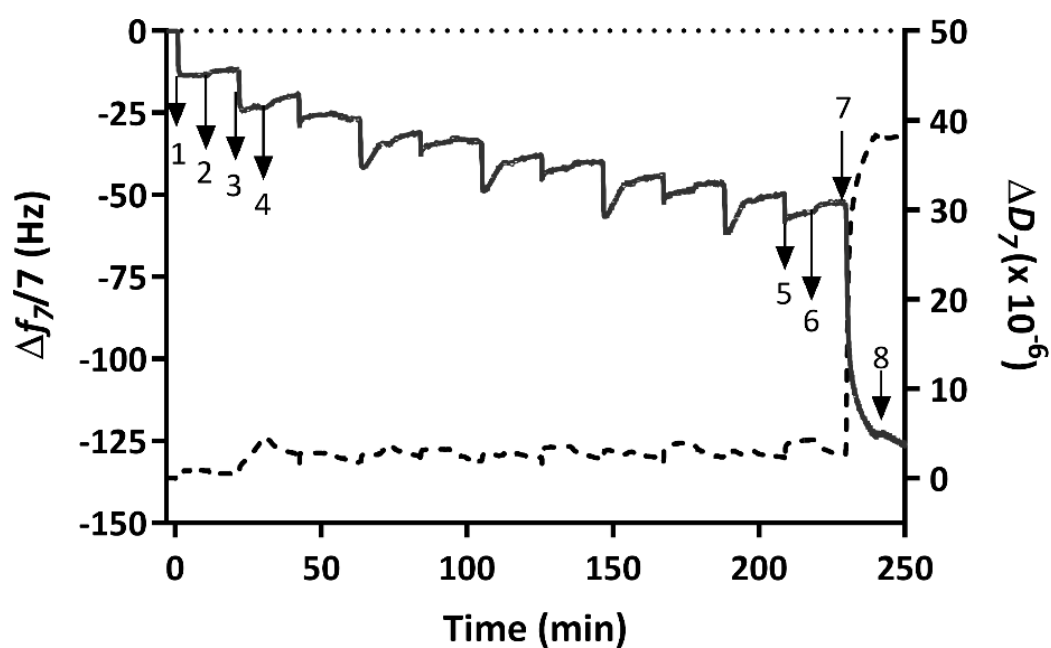

**Fig. S5** Build-up of the supramolecular multilayered thin films. Real time QCM-D monitoring of the normalized frequency ( $\Delta f_n/n$ ; solid line) and dissipation ( $\Delta D_n$ ; dashed line) changes, obtained at the 7<sup>th</sup> overtone ( $n = 7$ ; 35 MHz), as a function of time for the build-up of (PLL/HA)<sub>5</sub>/PLL multilayered nanofilms onto Au-coated quartz crystal sensors and subsequent adsorption of an K<sub>2</sub>PA-IKVAV outer layer. Numbers refer to the adsorption of PLL (1, 5), HA (3), K<sub>2</sub>PA-IKVAV (7), and rinsing steps (2, 4, 6 and 8).

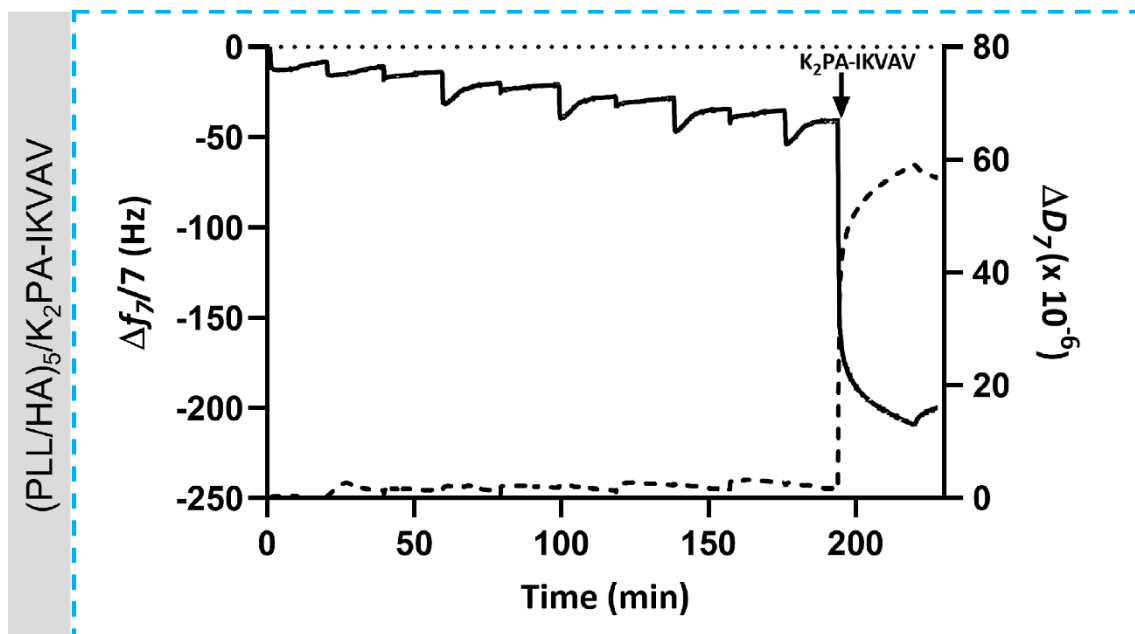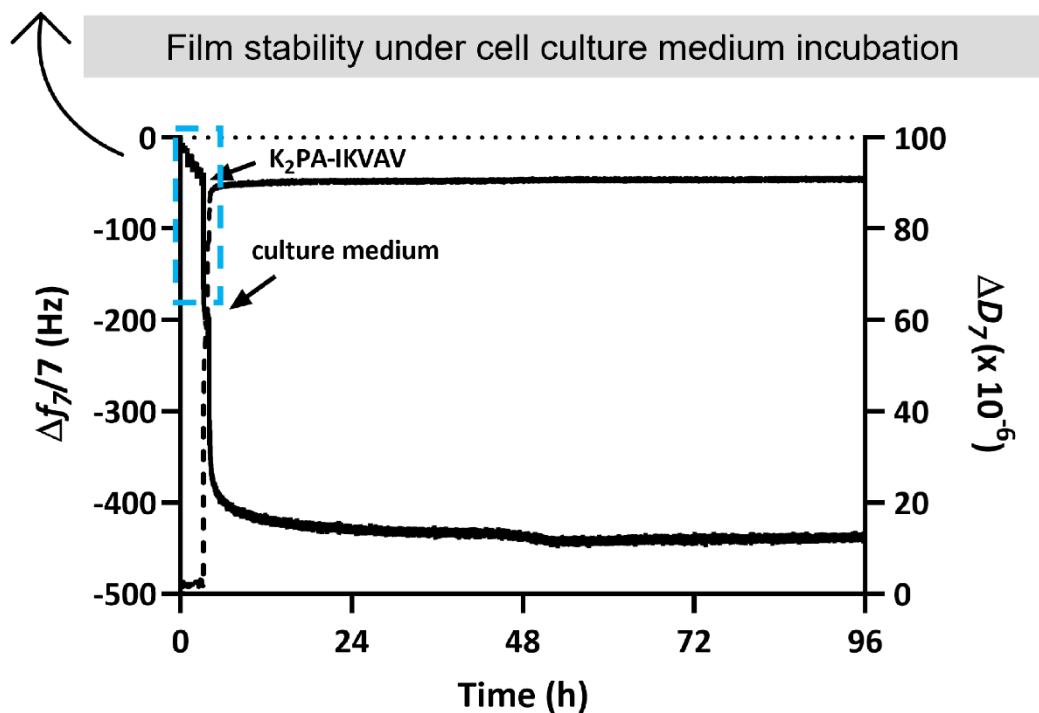

**Fig. S6** QCM-D study of the stability of the supramolecular multilayered films. Build-up of the (PLL/HA)<sub>5</sub> multilayered nanofilm onto Au-coated quartz crystal sensors and subsequent adsorption of K<sub>2</sub>PA-IKVAV molecules as the outer layer (top image), and further exposure of the film to cell culture medium for 4 days (bottom image). The  $\Delta f_n/n$  (solid line) and  $\Delta D_n$  (dashed line) changes as a function of time were obtained at the 7<sup>th</sup> overtone ( $n = 7$ ; 35 MHz).

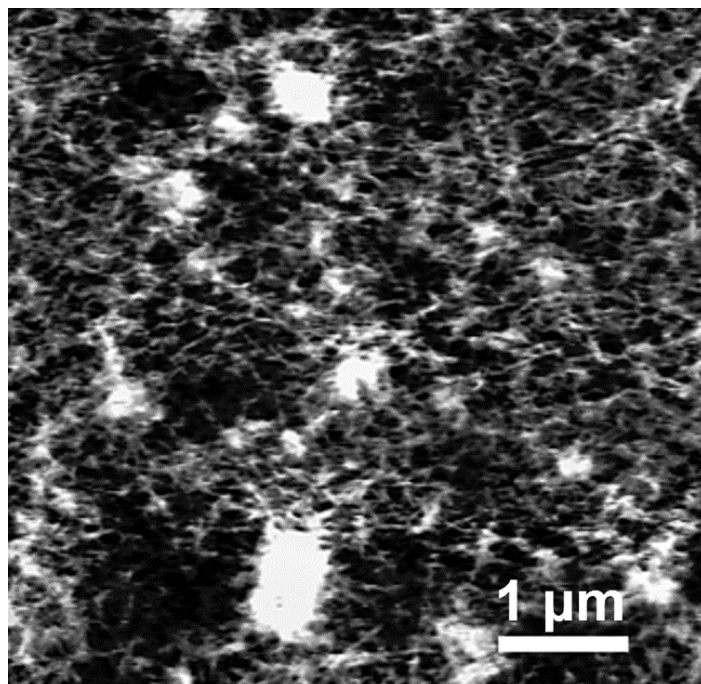

**Fig. S7** Representative AFM 2D topographic image for the (PLL/HA)<sub>5</sub>/K<sub>2</sub>PA-IKVAV functionalized Au substrate suggesting the deposition of nanofibrillar-like structures above the biopolymeric film surface. The original image was converted to grey, corrected for uneven illumination and background subtracted using ImageJ software. Scale bar: 1 μm.



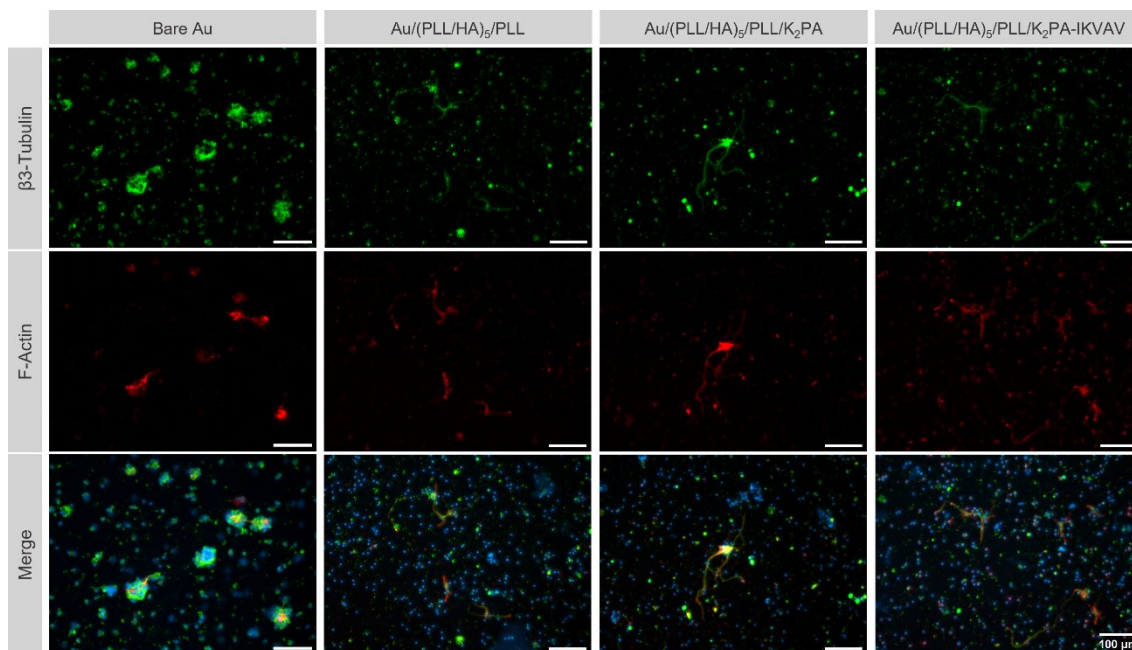

**Fig. S8** Morphology of primary neuronal cortical cells at 4 days of *in vitro* culture on uncoated and LbL coated Au surfaces. Representative fluorescence microscopy images of primary neuronal cortical cells at 4 days of culture on the bare Au substrate, and (PLL/HA)<sub>5</sub>/PLL, (PLL/HA)<sub>5</sub>/PLL/K<sub>2</sub>PA and (PLL/HA)<sub>5</sub>/PLL/K<sub>2</sub>PA-IKVAV functionalized Au substrate, after immunostaining with β-III tubulin (green), f-actin filaments (red), and nuclei counterstaining with Hoechst (blue). Scale bars: 100 μm.
